# Supplementary material
Source: PubMed Central journal article supplement (PMC4267474)
Supplement: NIHMS633134-supplement-Correspn_Author.pdf [file NIHMS633134-supplement-Correspn_Author.pdf]

Corresponding Author: David Nathan Weil; Professor of Economics; Box B, Brown University,  
Providence, RI 02912-B; (401) 863-1754; David\_Weil@Brown.edu
